# Supplementary material for: Gelatine–collagen photo-crosslinkable 3D matrixes for skin regeneration
Source: Royal Society of Chemistry journal article supplement (doi:10.1039/d3bm01849k), 2024-01-01
Supplement: d3bm01849k1.pdf [file d3bm01849k1.pdf]

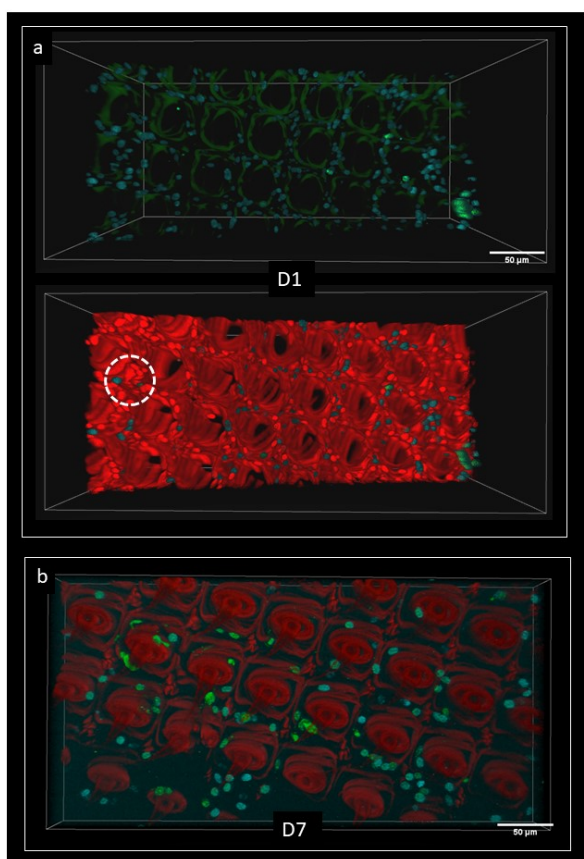

### Supplementary material

**Fig. 1S: Fibroblasts show cycle arrest or cell dead in soft areas in between the domes.** 3D Two photon images of fibroblasts at D1 (**fig. 1Sa**) and at D7 (**fig. 1Sb**) show adherence on soft areas on the TPP matrix without cell proliferation in time as observed for the fibroblasts on the domes (**see fig. 2**). In **fig. S1a**, the nuclei of all fibroblasts were stained with Hoechst (blue – green staining) and the dead fibroblasts with propidium iodide (red staining, see e.a. red nuclei in white dotted circle). The white box size in **fig. 1Sa** = 469 x 235 x 352 μm and in **fig. 1Sb** = 469 x 235 x 74 μm. The scale bar is 50 μm.

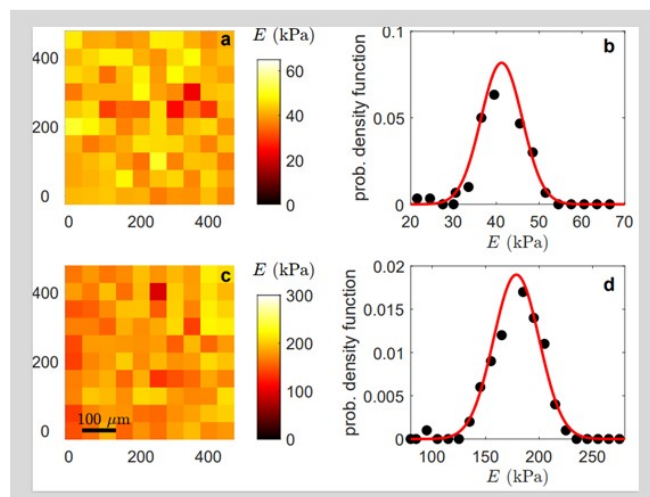

**Fig. 2S: Mechanical characterization of the stiff (a,b) and soft (c,d) matrices by microindentation.** Elasticity map over a region of interest of 500 μm square are reported in (a) and (c). Colors code for the Young modulus E. The probability density function of E is shown in (b) and (d), where the red curve is the best fit of the data by a Gaussian distribution.

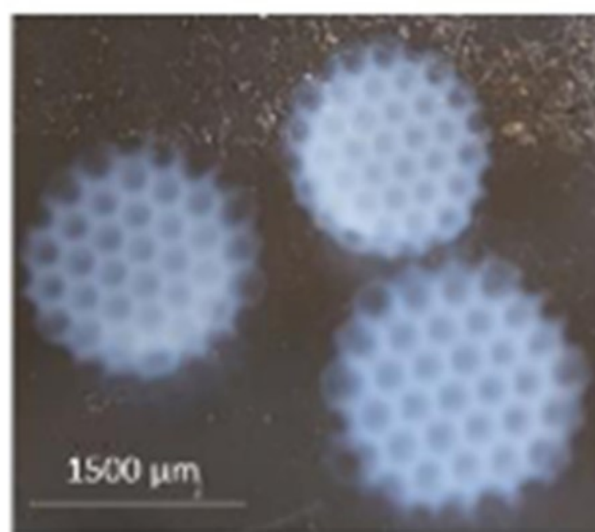

**Fig. 3S: DLP GelMA-collagen matrixes with honeycomb structures at the surface.** Colour photo showing structured DLP matrixes with a diameter of 1.5 mm.
